# Supplementary material for: Tuliposides H–J and Bioactive Components from the Bulb of Amana edulis
Source: Molecules. 2021 Sep 29;26(19):5907. doi: 10.3390/molecules26195907 (PMC8512022; doi:10.3390/molecules26195907)
Supplement: Supplementary file 1 [file molecules-26-05907-s001.zip › molecules-1404810-supplementary.pdf]

## Supplementary Materials for

Tuliposides H–J and Bioactive Components from the Bulb of *Amana edulis*

Chia-Lin Lee <sup>1,2,3,\*</sup>, Zhi-An Gao <sup>1</sup>, Yun-Lian Jhan <sup>1</sup>, Yuan-Shiun Chang <sup>4</sup> and Chao-Jung Chen <sup>5,6</sup>

<sup>1</sup> Department of Cosmeceutics, China Medical University, Taichung 406040, Taiwan; chlilee@mail.cmu.edu.tw (C.L.L.); s10061131@gmail.com (Z.A.G.); u9884002@cmu.edu.tw (Y.L.J.)

<sup>2</sup> Chinese Medicine Research and Development Center, China Medical University Hospital, Taichung 40402, Taiwan

<sup>3</sup> Chinese Medicine Research Center, China Medical University, Taichung 40402, Taiwan

<sup>4</sup> Department of Chinese Pharmaceutical Sciences and Chinese Medicine Resources, China Medical University, Taichung 40402, Taiwan; yschang@mail.cmu.edu.tw

<sup>5</sup> Graduate Institute of Integrated Medicine, China Medical University, Taichung 40402, Taiwan; ironmanchen@yahoo.com.tw

<sup>6</sup> Proteomics Core Laboratory, Department of Medical Research, China Medical University Hospital, Taichung 40402, Taiwan

\* Correspondence: [chlilee@mail.cmu.edu.tw](mailto:chlilee@mail.cmu.edu.tw); Tel.: + 886 4 22053366 ext 5806

|                                                                                                                                                                                                                                                                               |     |
|-------------------------------------------------------------------------------------------------------------------------------------------------------------------------------------------------------------------------------------------------------------------------------|-----|
| Figure S1. <sup>1</sup> H NMR (500 MHz, CD <sub>3</sub> OD) of compound <b>1</b> .....                                                                                                                                                                                        | S3  |
| Figure S2. <sup>13</sup> C NMR (125 MHz, CD <sub>3</sub> OD) of compound <b>1</b> .....                                                                                                                                                                                       | S3  |
| Figure S3. COSY spectrum (500 MHz, CD <sub>3</sub> OD) of compound <b>1</b> .....                                                                                                                                                                                             | S4  |
| Figure S4. HSQC spectrum (500 MHz, CD <sub>3</sub> OD) of compound <b>1</b> .....                                                                                                                                                                                             | S4  |
| Figure S5. HMBC spectrum (500 MHz, CD <sub>3</sub> OD) of compound <b>1</b> .....                                                                                                                                                                                             | S5  |
| Figure S6. <sup>1</sup> H NMR (500 MHz, CD <sub>3</sub> OD) of compound <b>2</b> .....                                                                                                                                                                                        | S5  |
| Figure S7. <sup>13</sup> C NMR (125 MHz, CD <sub>3</sub> OD) of compound <b>2</b> .....                                                                                                                                                                                       | S6  |
| Figure S8. COSY spectrum (500 MHz, CD <sub>3</sub> OD) of compound <b>2</b> .....                                                                                                                                                                                             | S6  |
| Figure S9. HSQC spectrum (500 MHz, CD <sub>3</sub> OD) of compound <b>2</b> .....                                                                                                                                                                                             | S7  |
| Figure S10. HMBC spectrum (500 MHz, CD <sub>3</sub> OD) of compound <b>2</b> .....                                                                                                                                                                                            | S7  |
| Figure S11. <sup>1</sup> H NMR (500 MHz, CD <sub>3</sub> OD) of compound <b>3</b> .....                                                                                                                                                                                       | S8  |
| Figure S12. <sup>13</sup> C NMR (125 MHz, CD <sub>3</sub> OD) of compound <b>3</b> .....                                                                                                                                                                                      | S8  |
| Figure S13. COSY spectrum (500 MHz, CD <sub>3</sub> OD) of compound <b>3</b> .....                                                                                                                                                                                            | S9  |
| Figure S14. HSQC spectrum (500 MHz, CD <sub>3</sub> OD) of compound <b>3</b> .....                                                                                                                                                                                            | S9  |
| Figure S15. HMBC spectrum (500 MHz, CD <sub>3</sub> OD) of compound <b>3</b> .....                                                                                                                                                                                            | S10 |
| Figure S16. <sup>1</sup> H NMR (500 MHz, D <sub>2</sub> O with 1 drop CD <sub>3</sub> OD) of TEW crude fraction.....                                                                                                                                                          | S10 |
| Figure S17. <sup>13</sup> C NMR (125 MHz, D <sub>2</sub> O with 1 drop CD <sub>3</sub> OD) of TEW crude fraction.....                                                                                                                                                         | S11 |
| Figure S18. COSY spectrum (500 MHz, D <sub>2</sub> O with 1 drop CD <sub>3</sub> OD) of TEW crude fraction.....                                                                                                                                                               | S11 |
| Figure S19. HSQC spectrum (500 MHz, D <sub>2</sub> O with 1 drop CD <sub>3</sub> OD) of TEW crude fraction.....                                                                                                                                                               | S12 |
| Figure S20. HMBC spectrum (500 MHz, D <sub>2</sub> O with 1 drop CD <sub>3</sub> OD) of TEW crude fraction.....                                                                                                                                                               | S12 |
| Figure S21. <sup>1</sup> H NMR (500 MHz, D <sub>2</sub> O with 1 drop CD <sub>3</sub> OD) of D-glucose standard, TEW,<br>and D-fructose standard, respectively.....                                                                                                           | S13 |
| Figure S22. <sup>13</sup> C NMR (125 MHz, D <sub>2</sub> O with 1 drop CD <sub>3</sub> OD) of D-glucose standard, TEW,<br>and D-fructose standard, respectively.....                                                                                                          | S13 |
| Figure S23. TLC analysis of TEW.....                                                                                                                                                                                                                                          | S14 |
| Figure S24. Cytotoxicity toward B16 and the regulation of melanogenesis effects in B16 cells<br>of crude extract TEM, fractions TEE, TEB, and TEW, respectively .....                                                                                                         | S14 |
| Figure S25. Cytotoxicity data of compounds <b>1–12</b> toward B16 cells.....                                                                                                                                                                                                  | S15 |
| Figure S26. A correlation graph between the cellular melanin contents and the effects on<br>tyrosinase of compounds <b>4, 6, 10, and 12</b> .....                                                                                                                             | S16 |
| Figure S27. Effects of compounds <b>4, 6, 10, and 12</b> without co-treated α-MSH on<br>melanin content of B16 melanoma cells.....                                                                                                                                            | S16 |
| Figure S28. <sup>1</sup> H NMR (400 MHz, CDCl <sub>3</sub> ) (A), <sup>13</sup> C NMR (100 MHz, CDCl <sub>3</sub> ) (B), and<br>optical rotation data (C) of the product, 3-methyldihydrofuran-2(3 <i>H</i> )-one<br>obtained from acid hydrolysis of compound <b>2</b> ..... | S17 |
| Figure S29. The possible biosynthesis of compounds <b>1–3</b> .....                                                                                                                                                                                                           | S18 |
| Table S1. Tyrosinase activity effects of compounds <b>4, 6, 10, and 12</b> .....                                                                                                                                                                                              | S15 |

TEB-3-6-4-4-1 1H 500 MHz/CD3OD 2020.05.06

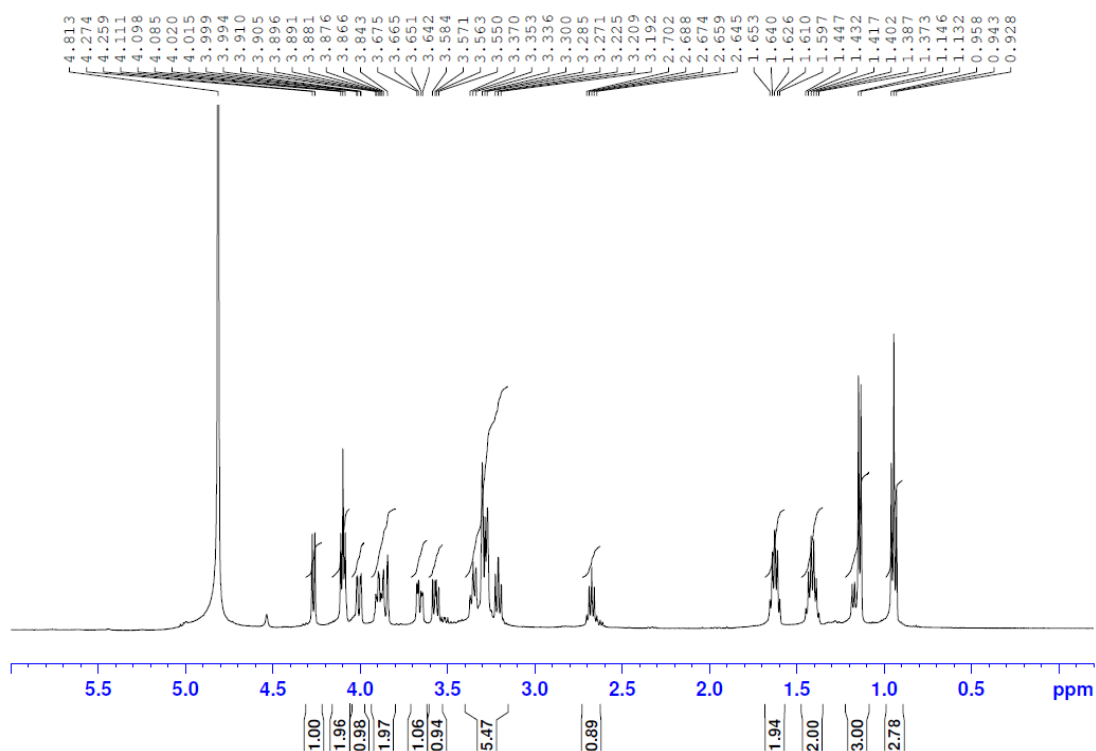

Figure S1.  $^1\text{H}$  NMR (500 MHz,  $\text{CD}_3\text{OD}$ ) of compound **1**.

TEB-3-6-4-4-1  $^{13}\text{C}$  125 MHz/CD3OD 2020.05.06

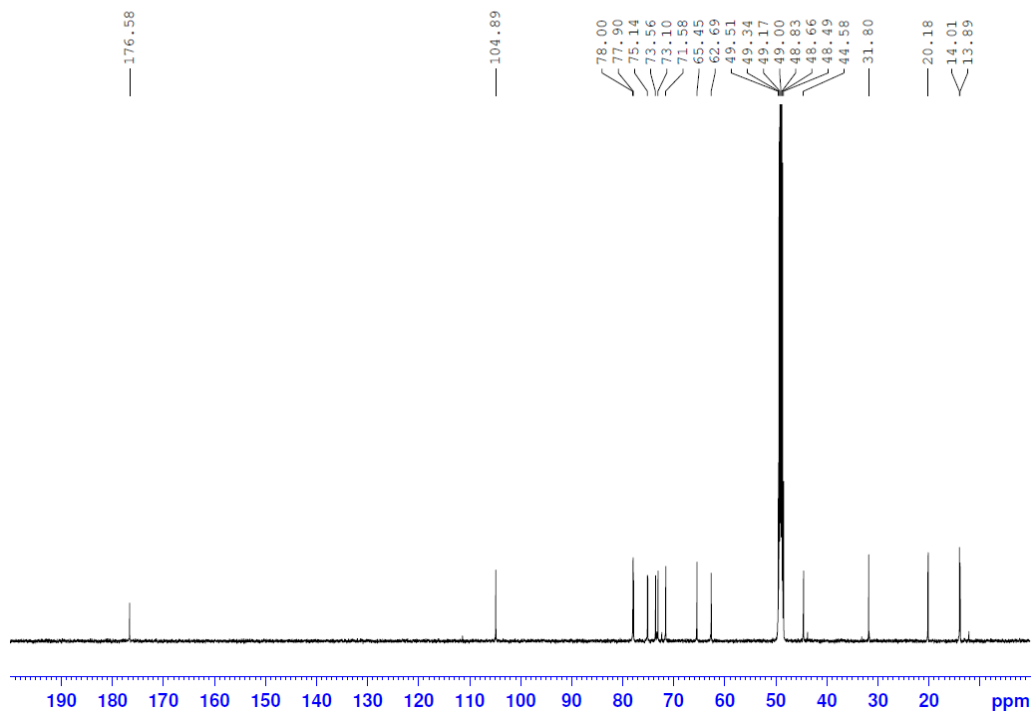

Figure S2.  $^{13}\text{C}$  NMR (125 MHz,  $\text{CD}_3\text{OD}$ ) of compound **1**.

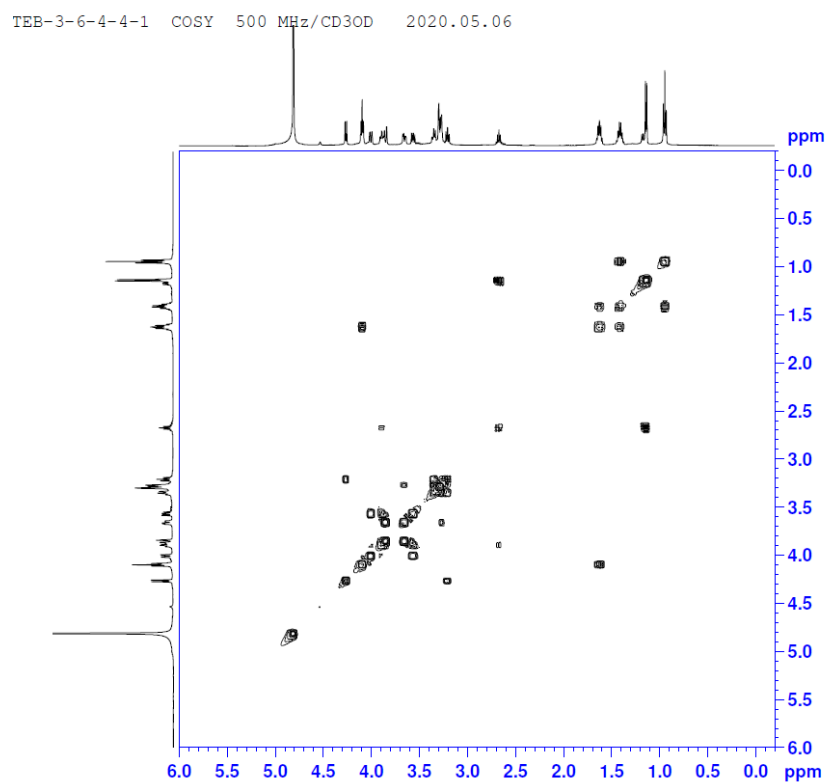

**Figure S3.** COSY spectrum (500 MHz, CD<sub>3</sub>OD) of compound **1**.

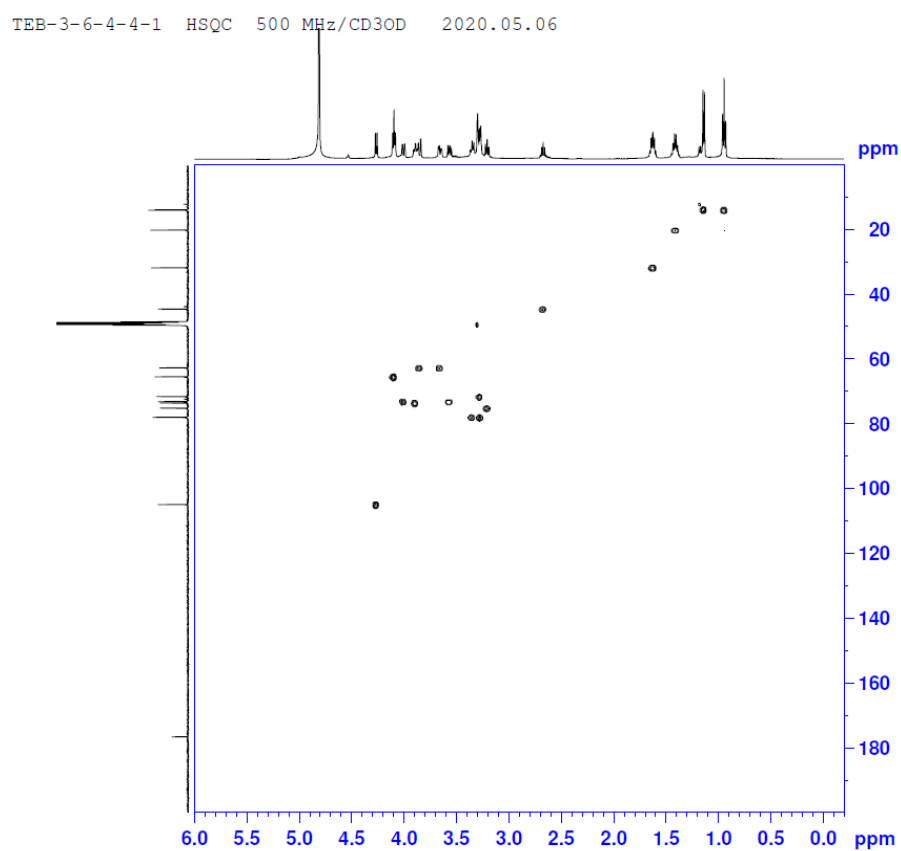

**Figure S4.** HSQC spectrum (500 MHz, CD<sub>3</sub>OD) of compound **1**.

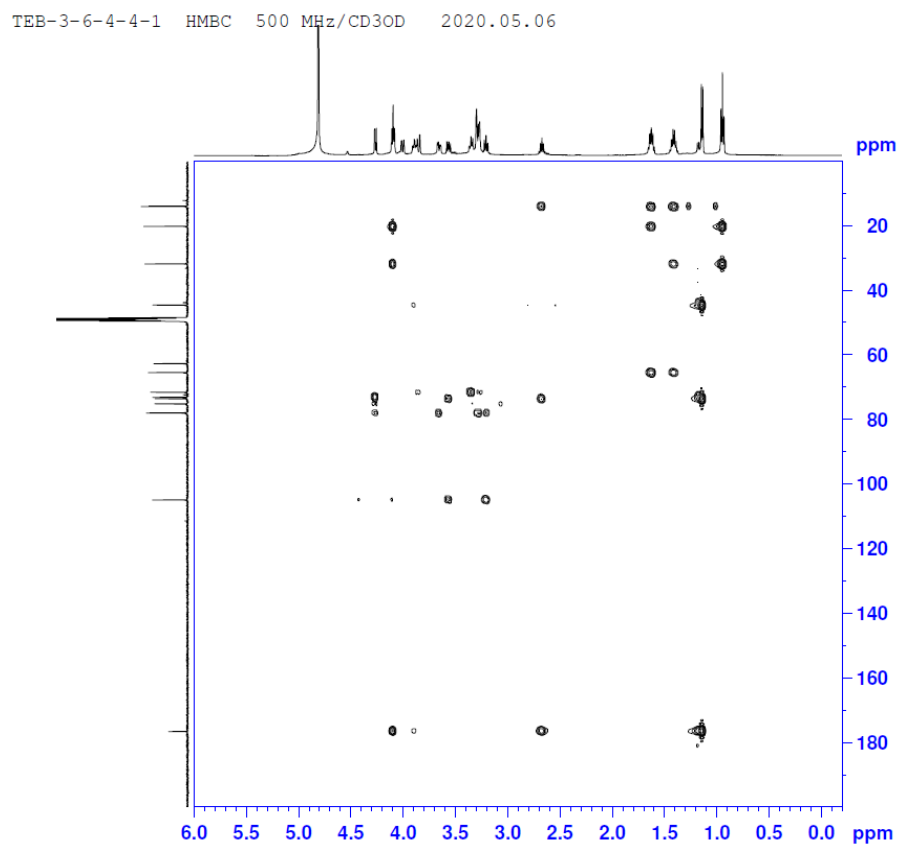

**Figure S5.** HMBC spectrum (500 MHz, CD<sub>3</sub>OD) of compound **1**.

TEB-3-10-6 1H 500 MHz/CD<sub>3</sub>OD 2020.05.21

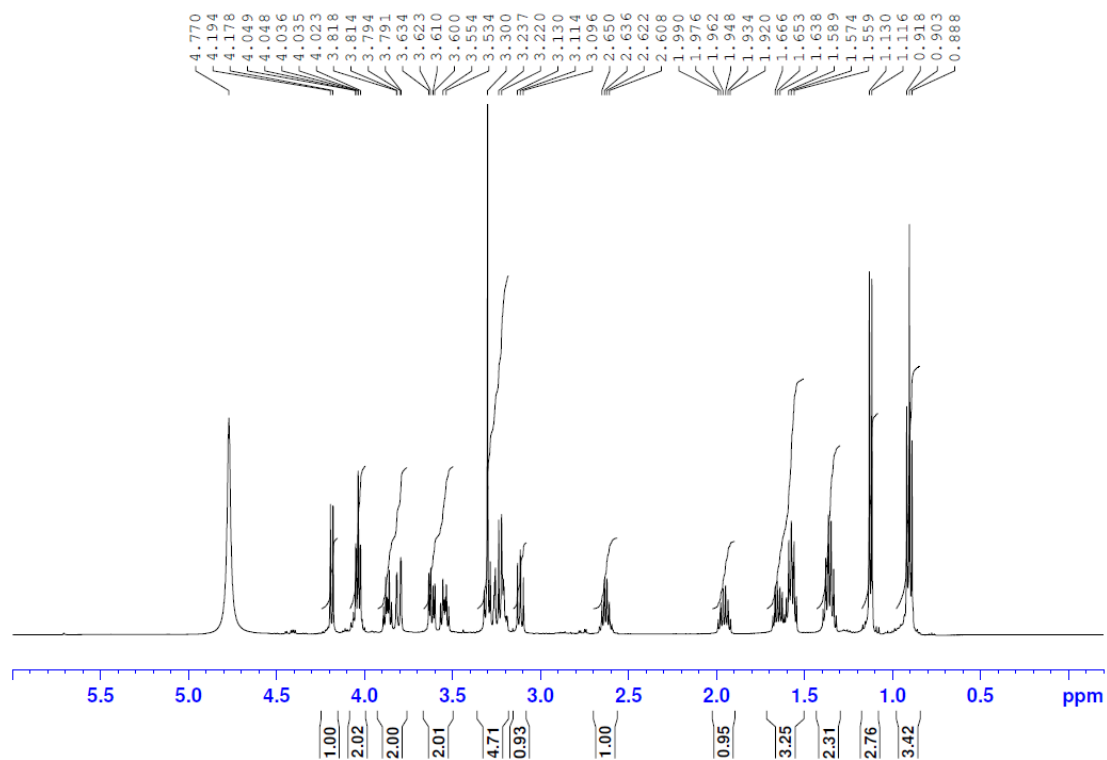

**Figure S6.** <sup>1</sup>H NMR (500 MHz, CD<sub>3</sub>OD) of compound **2**.

TEB-3-10-6  $^{13}\text{C}$  125 MHz/CD<sub>3</sub>OD 2020.05.21

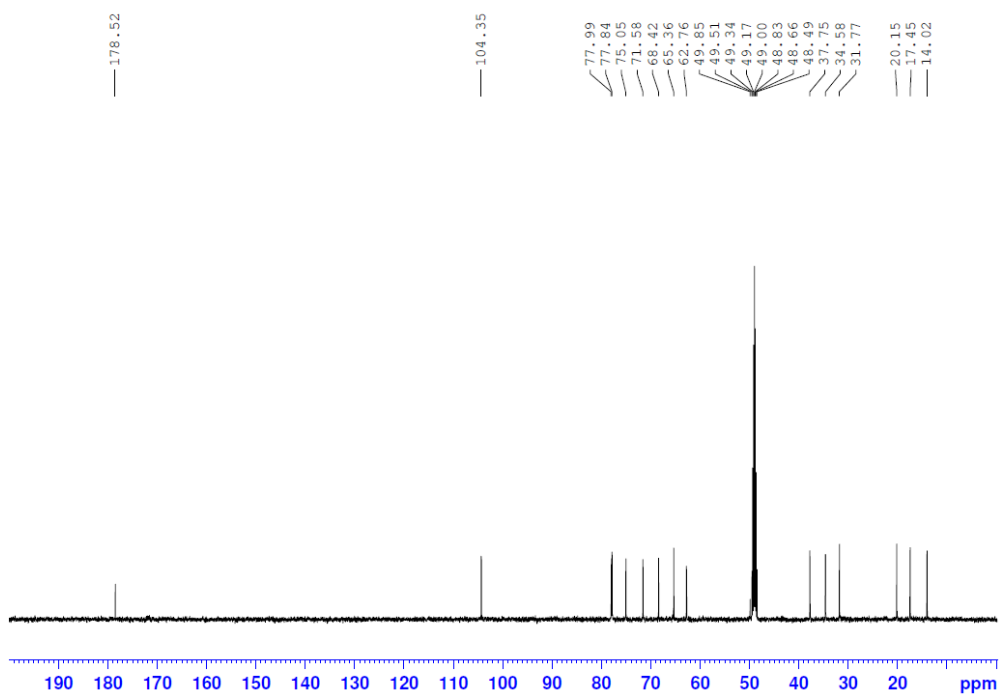

**Figure S7.**  $^{13}\text{C}$  NMR (125 MHz, CD<sub>3</sub>OD) of compound **2**.

TEB-3-10-6 COSY 500 MHz/CD<sub>3</sub>OD 2020.05.21

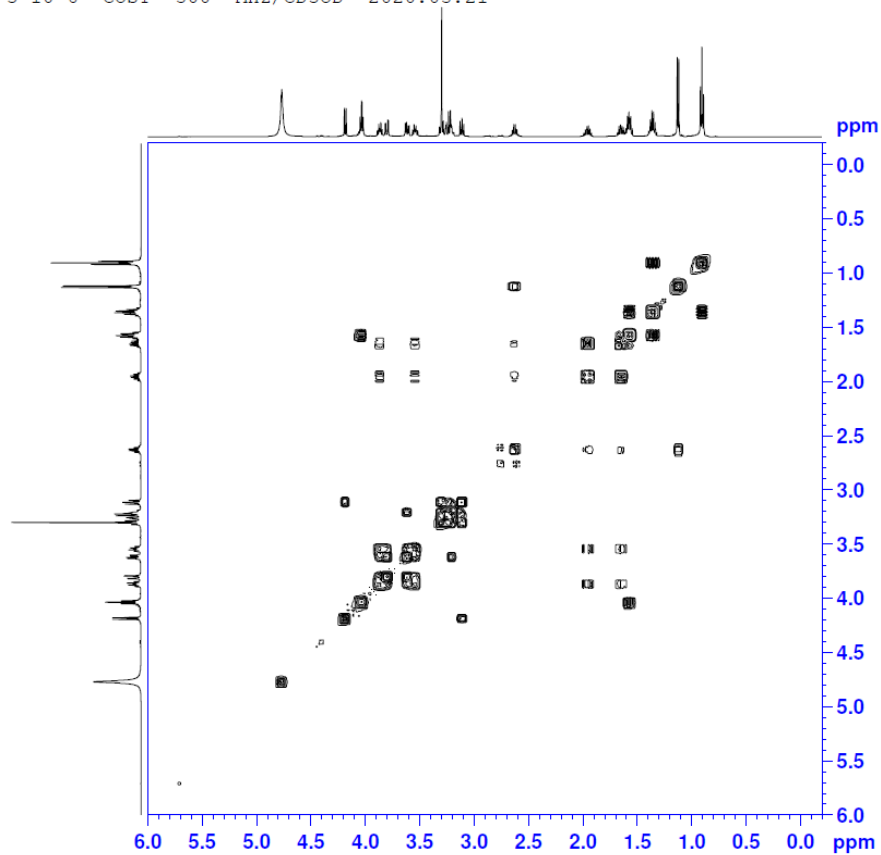

**Figure S8.** COSY spectrum (500 MHz, CD<sub>3</sub>OD) of compound **2**.

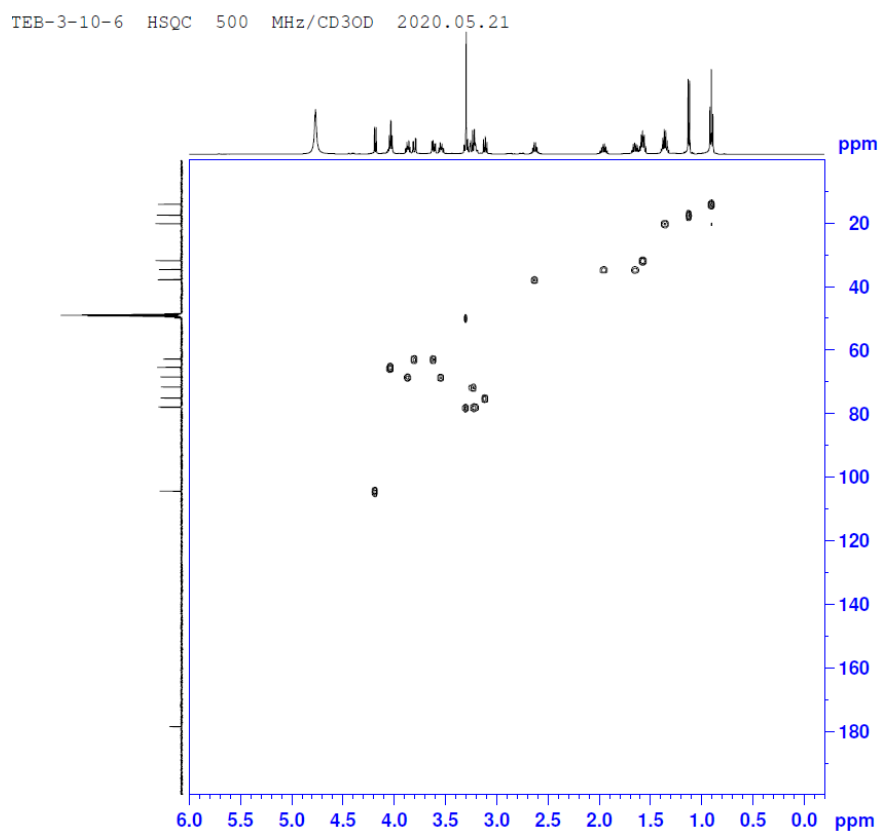

**Figure S9.** HSQC spectrum (500 MHz, CD<sub>3</sub>OD) of compound **2**.

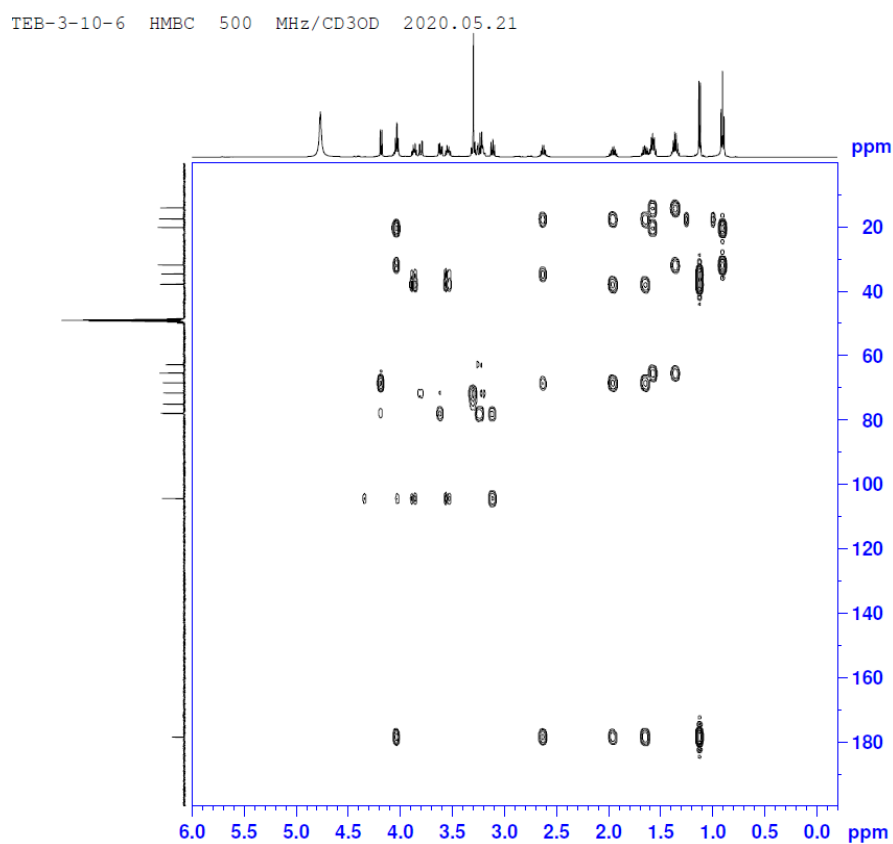

**Figure S10.** HMBC spectrum (500 MHz, CD<sub>3</sub>OD) of compound **2**.

TEB-3-10-2-2 1H 500 MHz/CD3OD 2020.06.17

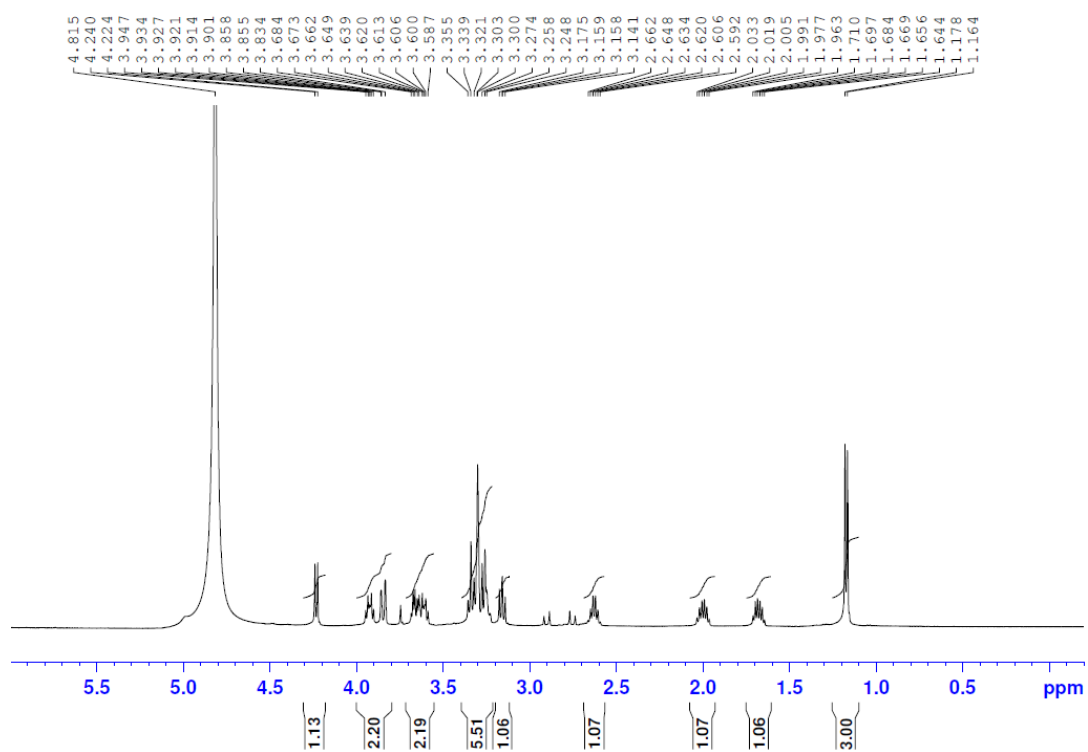

Figure S11.  $^1\text{H}$  NMR (500 MHz,  $\text{CD}_3\text{OD}$ ) of compound **3**.

TEB-3-10-2-2 13C 125 MHz/CD3OD 2020.06.17

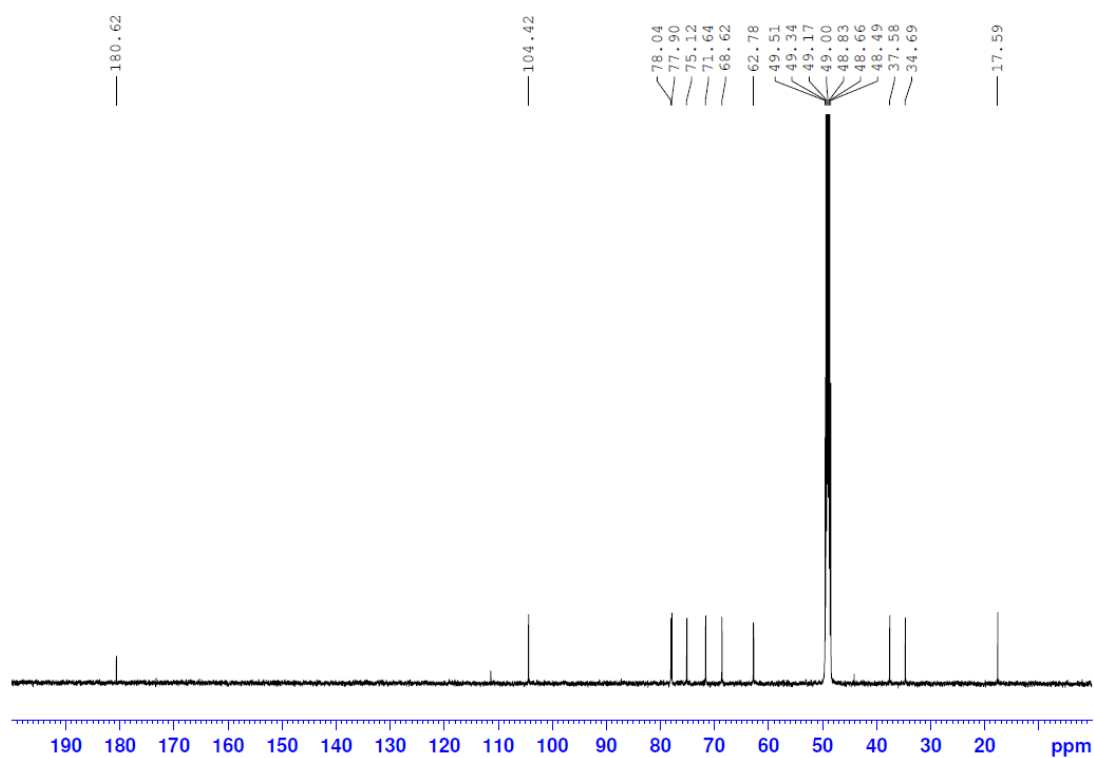

Figure S12.  $^{13}\text{C}$  NMR (125 MHz,  $\text{CD}_3\text{OD}$ ) of compound **3**.

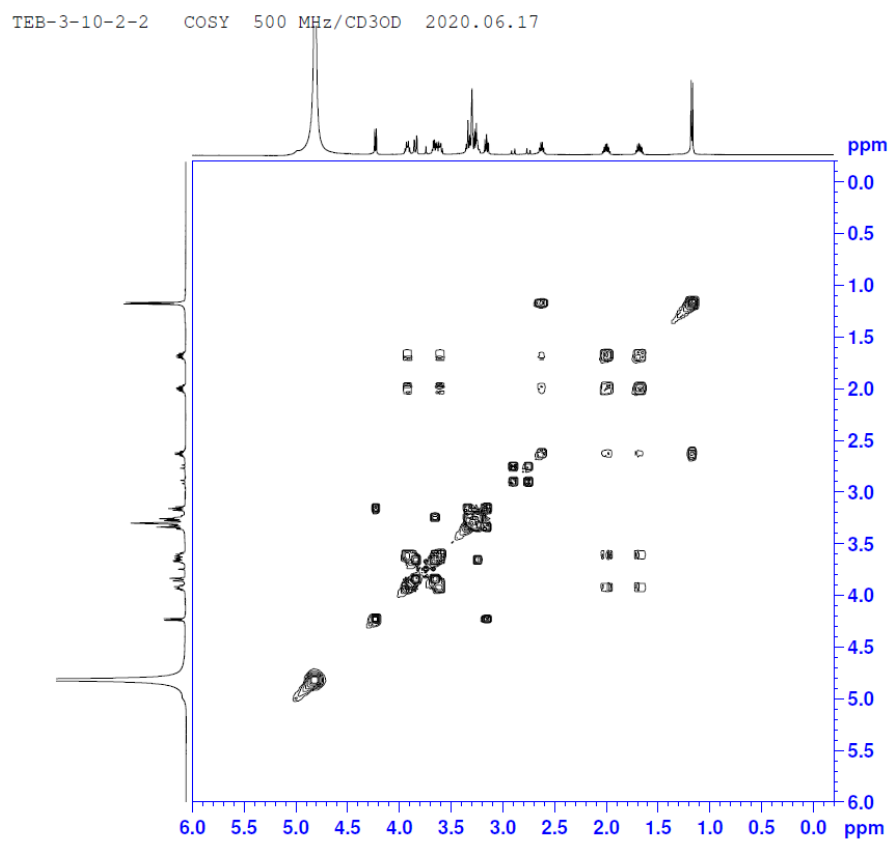

**Figure S13.** COSY spectrum (500 MHz, CD<sub>3</sub>OD) of compound **3**.

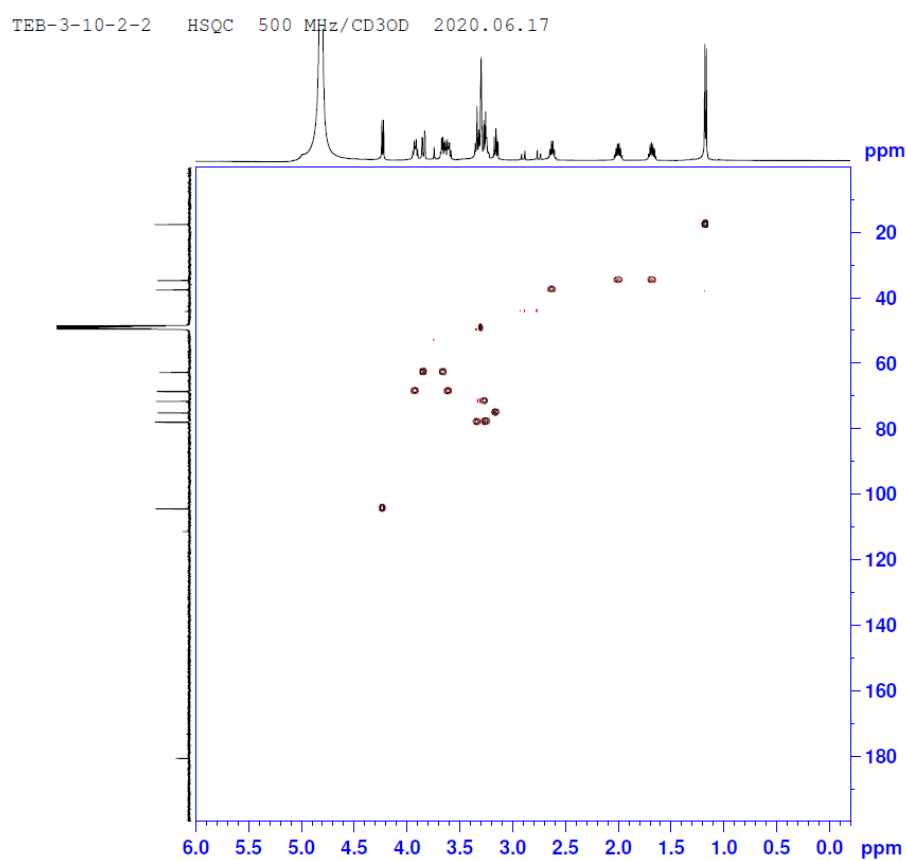

**Figure S14.** HSQC spectrum (500 MHz, CD<sub>3</sub>OD) of compound **3**.

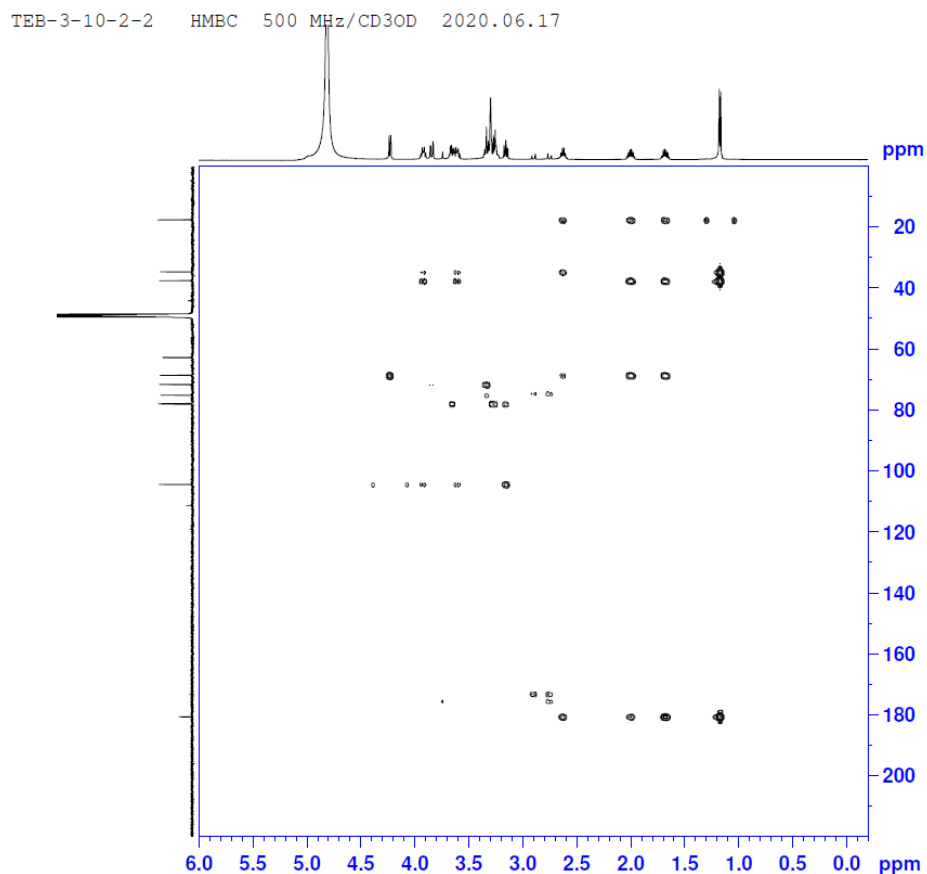

**Figure S15.** HMBC spectrum (500 MHz,  $C_5D_5N$ ) of compound **3**.

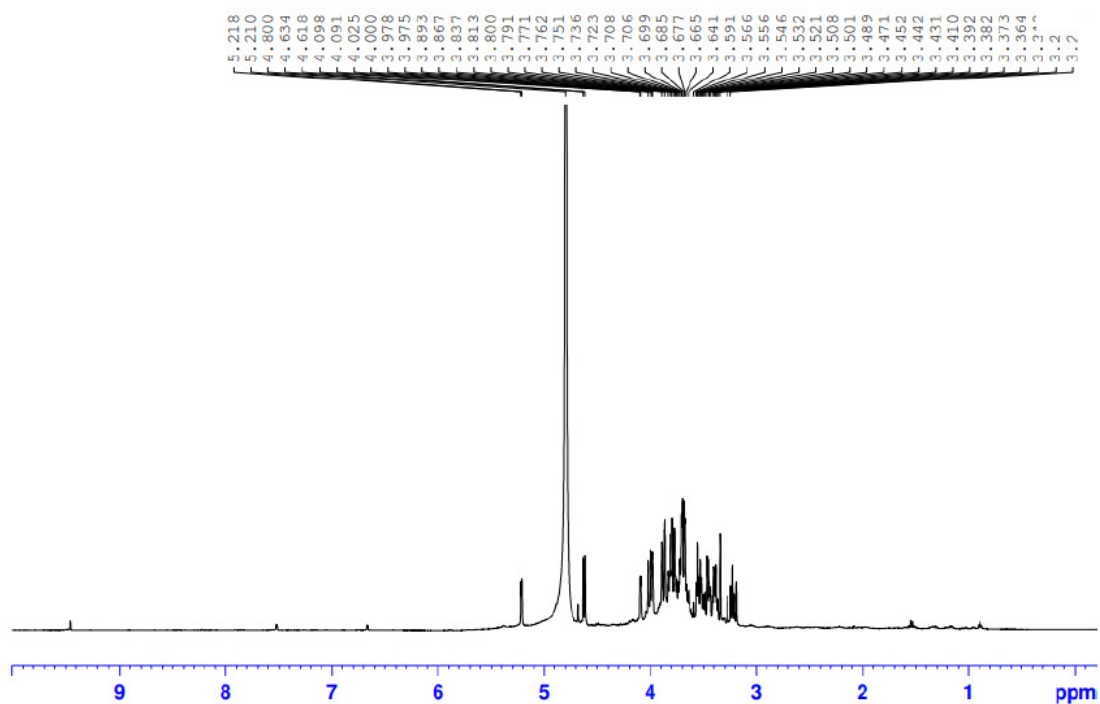

**Figure S16.**  $^1H$  NMR (500 MHz,  $D_2O$  with 1 drop  $CD_3OD$ ) of TEW crude fraction.

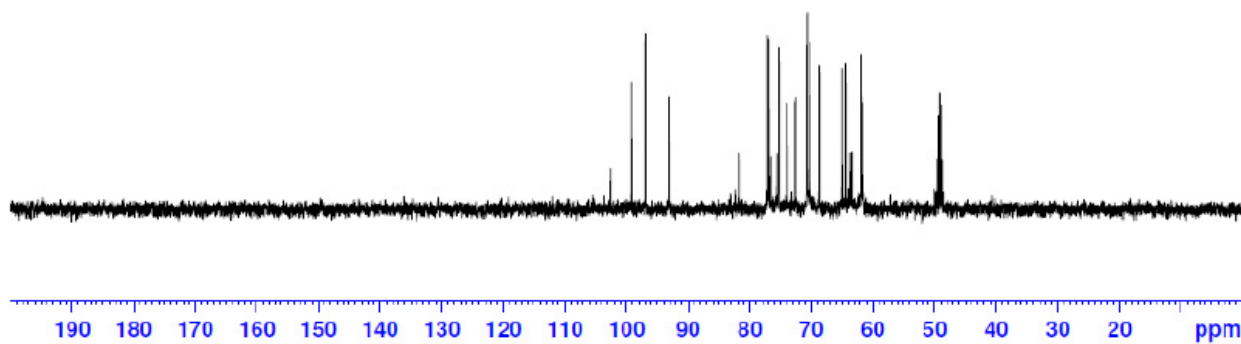

**Figure S17.**  $^{13}\text{C}$  NMR (125 MHz,  $\text{D}_2\text{O}$  with 1 drop  $\text{CD}_3\text{OD}$ ) of TEW crude fraction.

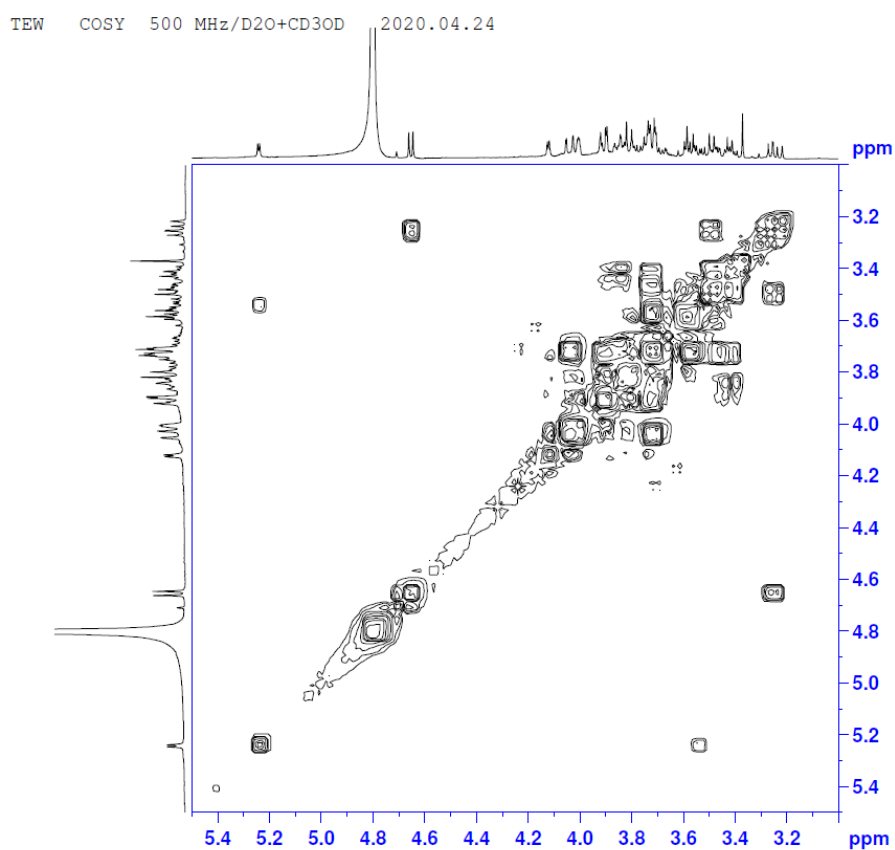

**Figure S18.** COSY spectrum (500 MHz,  $\text{D}_2\text{O}$  with 1 drop  $\text{CD}_3\text{OD}$ ) of TEW crude fraction.

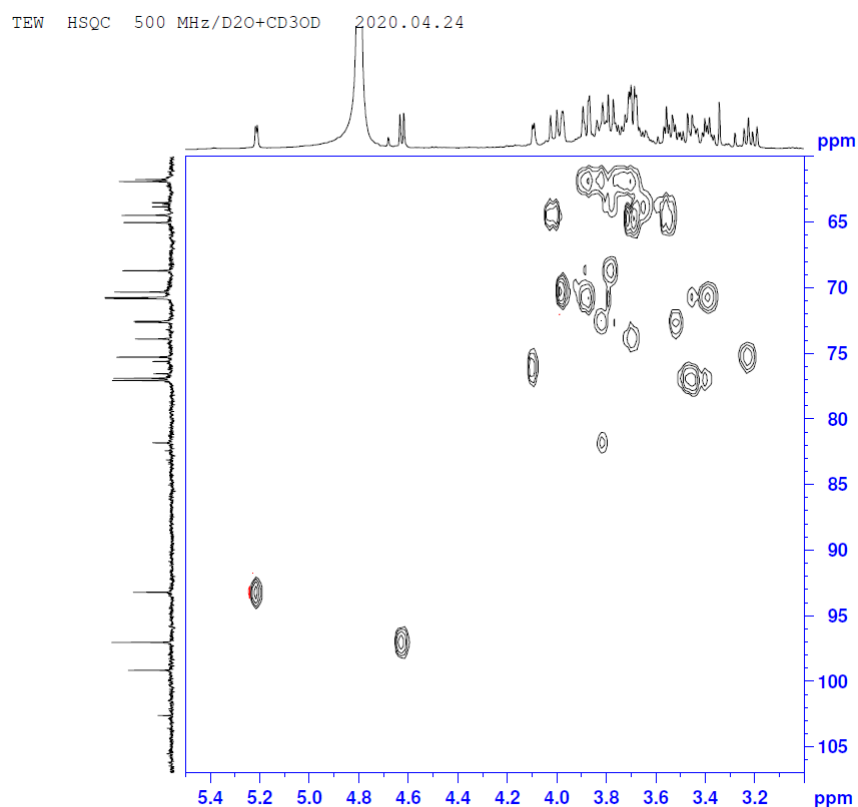

**Figure S19.** HSQC spectrum (500 MHz, D<sub>2</sub>O with 1 drop CD<sub>3</sub>OD) of TEW crude fraction.

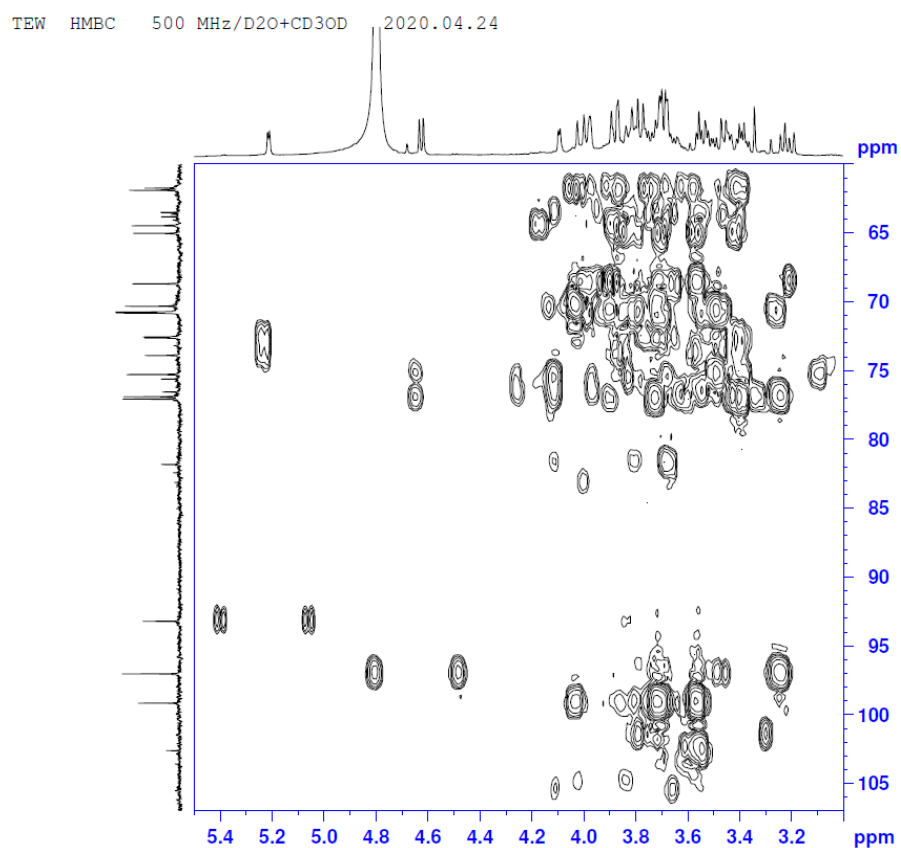

**Figure S20.** HMBC spectrum (500 MHz, D<sub>2</sub>O with 1 drop CD<sub>3</sub>OD) of TEW crude fraction.

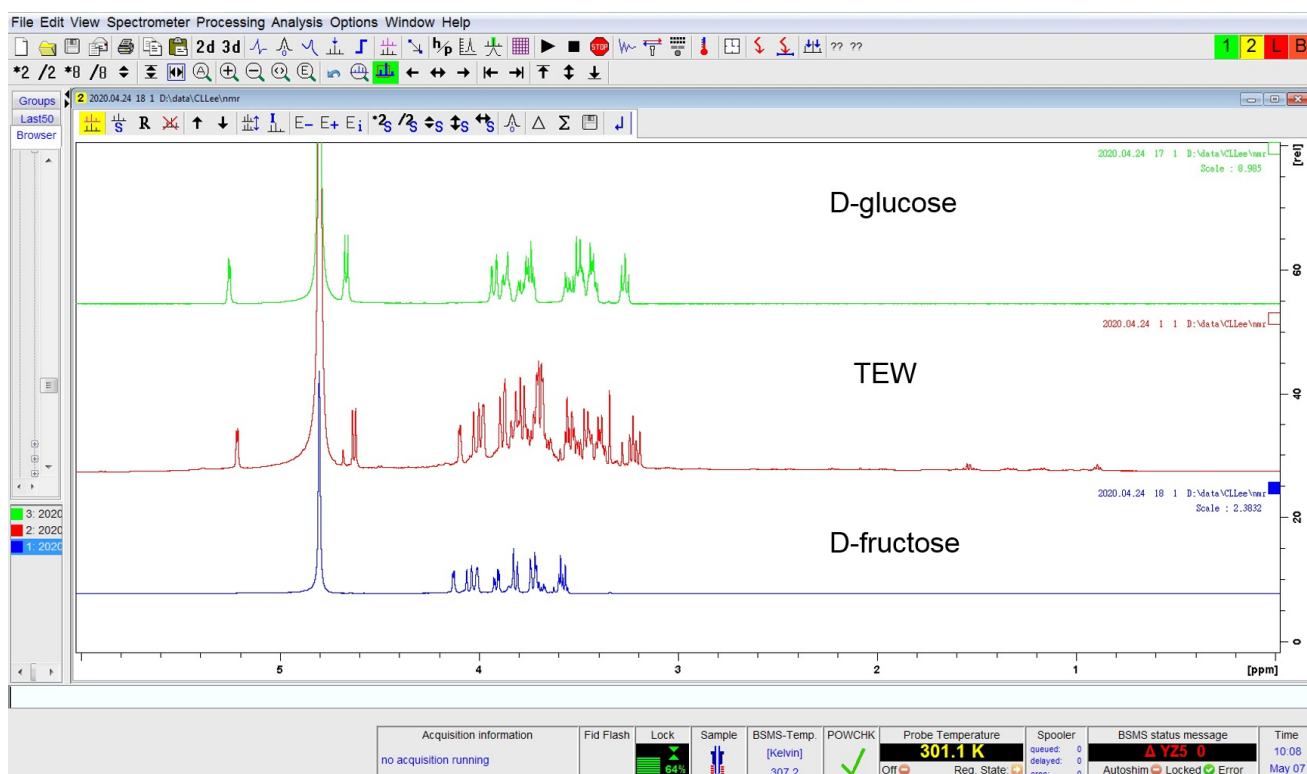

**Figure S21.**  $^1\text{H}$  NMR (500 MHz,  $\text{D}_2\text{O}$  with 1 drop  $\text{CD}_3\text{OD}$ ) of D-glucose standard, TEW, and D-fructose standard, respectively.

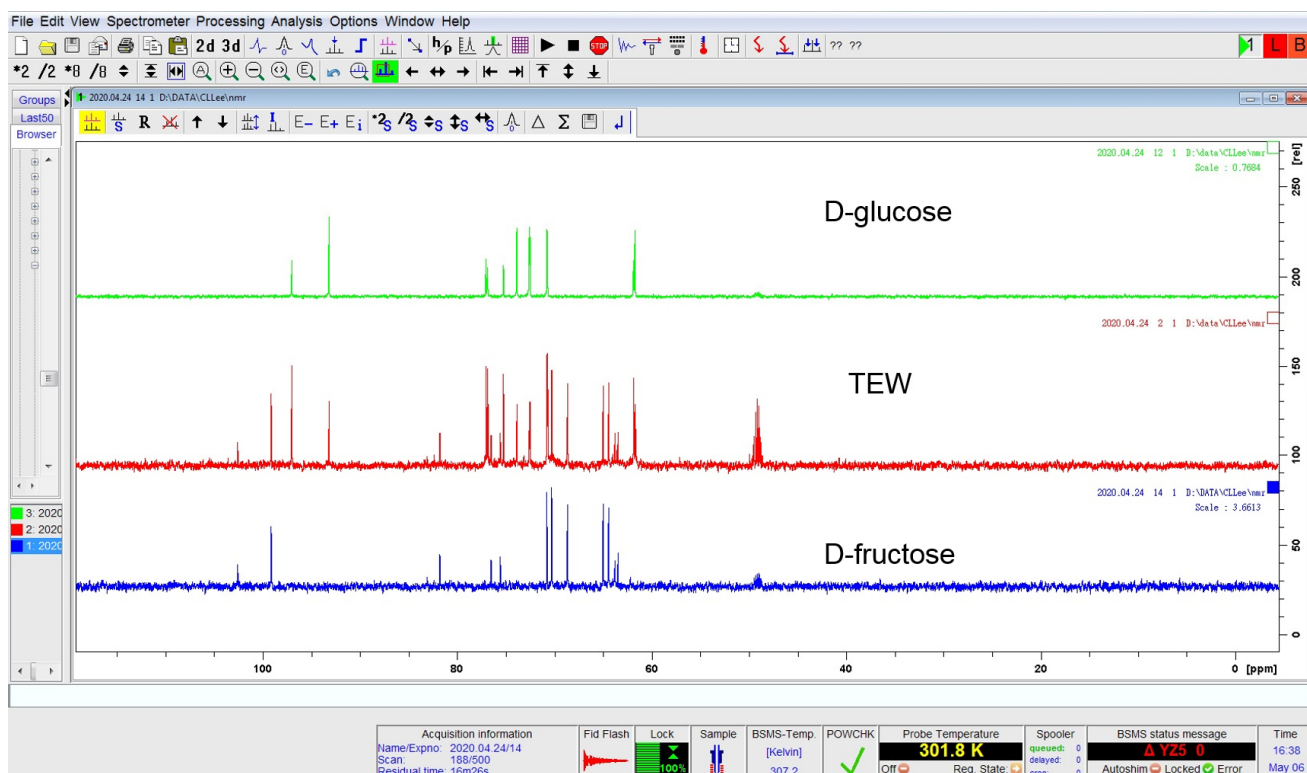

**Figure S22.**  $^{13}\text{C}$  NMR (125 MHz,  $\text{D}_2\text{O}$  with 1 drop  $\text{CD}_3\text{OD}$ ) of D-glucose standard, TEW, and D-fructose standard, respectively.

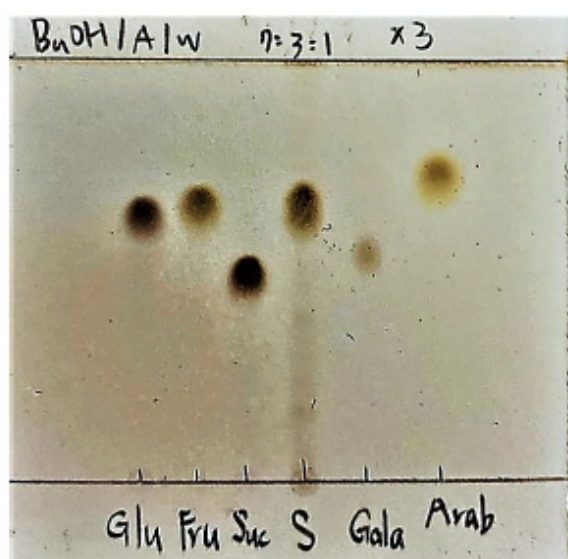

**Figure S23.** TLC analysis of TEW (S) were compared against glucose (Glc), fructose (Fru), sucrose (Suc), galactose (Gala), and arabinose (Arab). Stationary phase: silica gel; Mobile phase: *n*-butanol/acetone/water, 7:3:1 for developing with three times. Being stained by spraying with 5% (v/v) sulfuric acid in MeOH solution before heating on a hot plate.

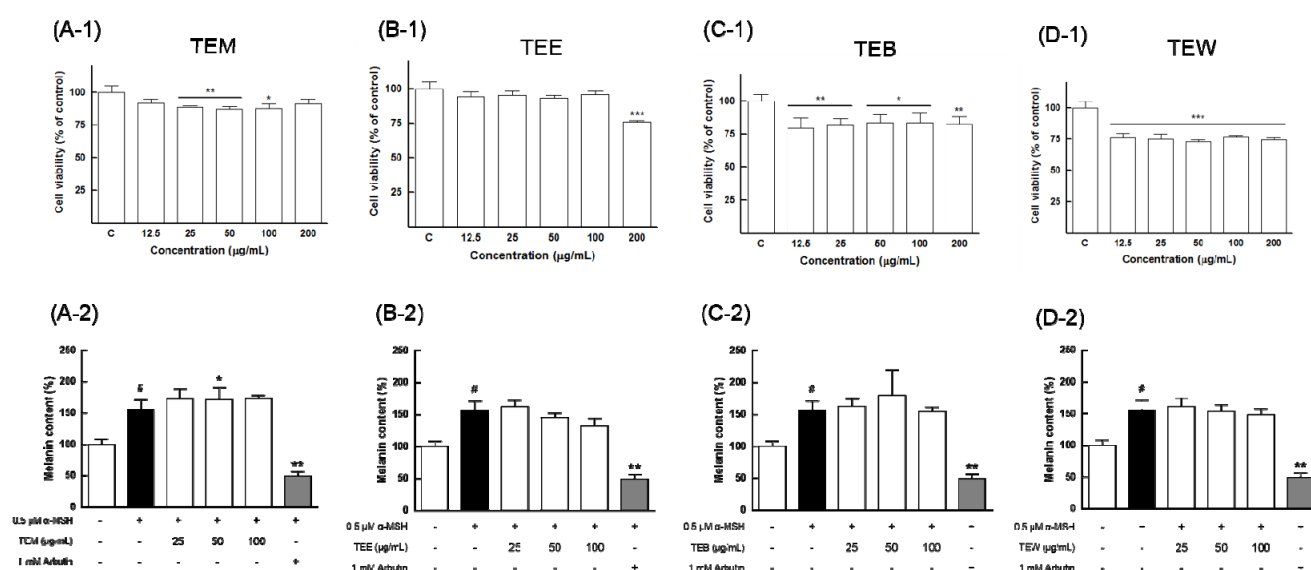

**Figure S24.** Cytotoxicity toward B16 (A-1 to D-1) and the regulation of melanogenesis effects in B16 cells (A-2 to D-2) of crude extract TEM, fractions TEE, TEB, and TEW, respectively. The data shown are representative of three independent experiments. #,  $p < 0.001$  compared with control group, and \*,  $p < 0.05$ , \*\*,  $p < 0.01$ , and \*\*\*,  $p < 0.001$  compared with the control group (A-1 to D-1) or  $\alpha$ -MSH treated group (A-2 to D-2).

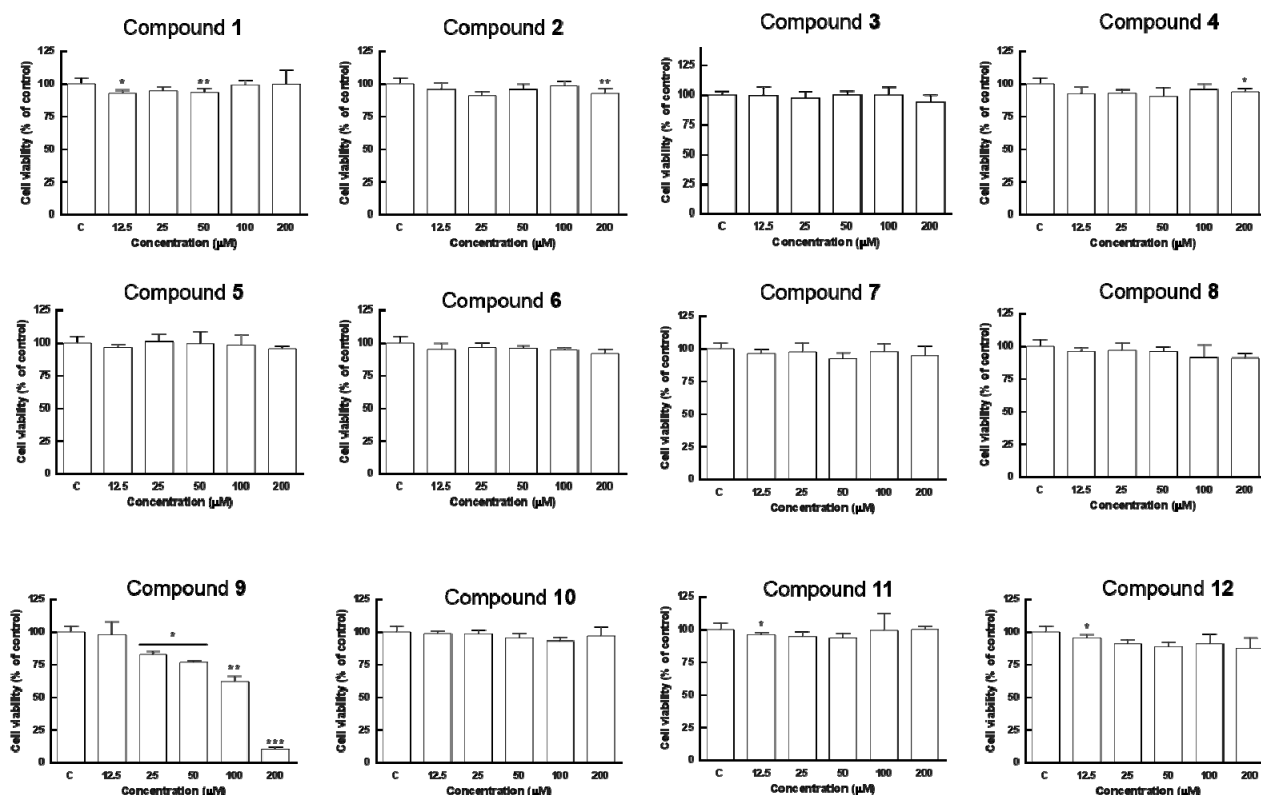

**Figure S25.** Cytotoxicity data of compounds 1–12 toward B16 cells. The data shown are representative of three independent experiments. \*,  $p < 0.05$ , \*\*,  $p < 0.01$ , and \*\*\*,  $p < 0.001$  compared with the control group. Compound 9 has a cytotoxic  $IC_{50}$  value of  $81.9 \pm 1.3 \mu M$ .

**Table S1.** Tyrosinase activity effects of compounds 4, 6, 10, and 12.

| Compd | Tyrosinase activity (%)      |       |            | Compd                        | Tyrosinase activity (%) |            |  |
|-------|------------------------------|-------|------------|------------------------------|-------------------------|------------|--|
| 4     | Control                      | 100.0 | $\pm 16.0$ | Control                      | 100.0                   | $\pm 13.7$ |  |
|       | $\alpha$ -MSH (0.5 $\mu M$ ) | 254.3 | $\pm 5.3$  | $\alpha$ -MSH (0.5 $\mu M$ ) | 282.7                   | $\pm 19.2$ |  |
|       | Arbutin (1 mM)               | 152.0 | $\pm 14.2$ | Arbutin (1 mM)               | 145.2                   | $\pm 13.0$ |  |
|       | 10 $\mu M$                   | 290.1 | $\pm 7.1$  | 10 $\mu M$                   | 327.5                   | $\pm 8.9$  |  |
|       | 20 $\mu M$                   | 306.8 | $\pm 16.5$ | 20 $\mu M$                   | 343.3                   | $\pm 17.6$ |  |
|       | 40 $\mu M$                   | 309.9 | $\pm 13.2$ | 40 $\mu M$                   | 344.5                   | $\pm 12.0$ |  |
| Compd | Tyrosinase activity (%)      |       |            | Compd                        | Tyrosinase activity (%) |            |  |
| 10    | Control                      | 100.0 | $\pm 13.3$ | Control                      | 100.0                   | $\pm 13.7$ |  |
|       | $\alpha$ -MSH (0.5 $\mu M$ ) | 260.1 | $\pm 10.2$ | $\alpha$ -MSH (0.5 $\mu M$ ) | 305.5                   | $\pm 9.8$  |  |
|       | Arbutin (1 mM)               | 140.2 | $\pm 7.2$  | Arbutin (1 mM)               | 129.2                   | $\pm 12.4$ |  |
|       | 10 $\mu M$                   | 282.1 | $\pm 13.2$ | 10 $\mu M$                   | 328.3                   | $\pm 11.6$ |  |
|       | 20 $\mu M$                   | 288.6 | $\pm 8.2$  | 20 $\mu M$                   | 339.3                   | $\pm 15.1$ |  |
|       | 40 $\mu M$                   | 294.1 | $\pm 9.2$  | 40 $\mu M$                   | 341.7                   | $\pm 14.9$ |  |

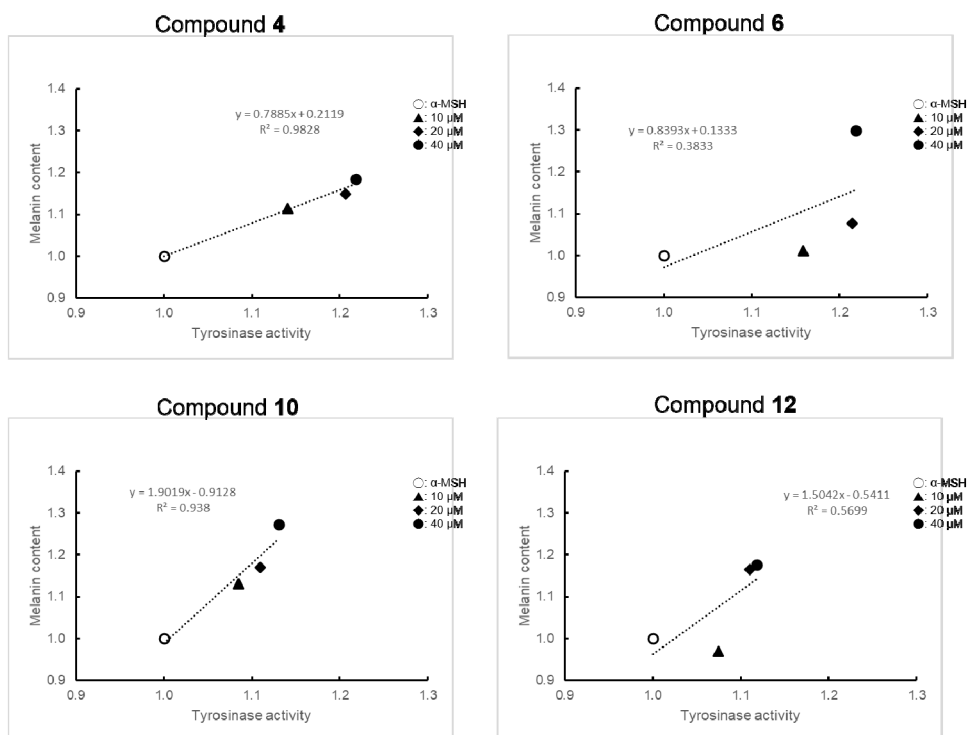

**Figure S26.** A correlation graph between the cellular melanin contents and the effects on tyrosinase of compounds 4, 6, 10, and 12.

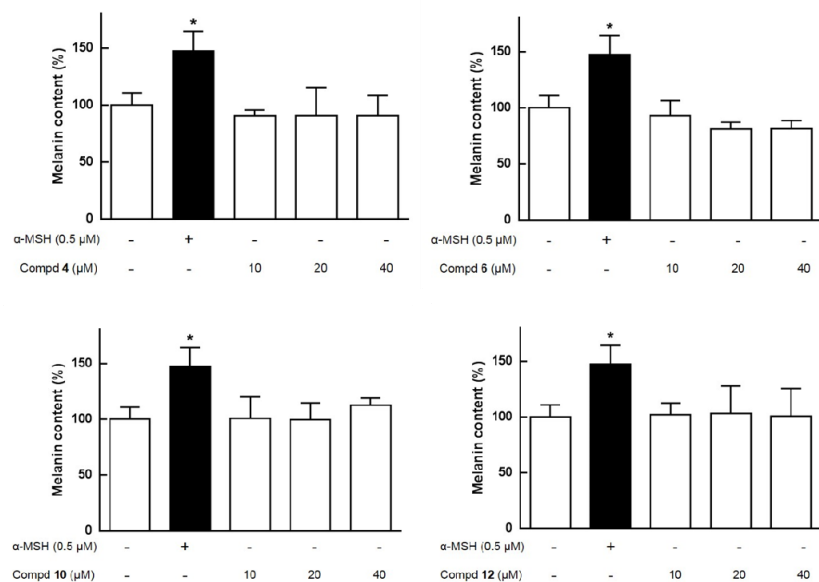

**Figure S27.** Effects of compounds 4, 6, 10, and 12 without co-treated  $\alpha$ -MSH on melanin content of B16 melanoma cells. \*,  $p < 0.05$  compared with control group.

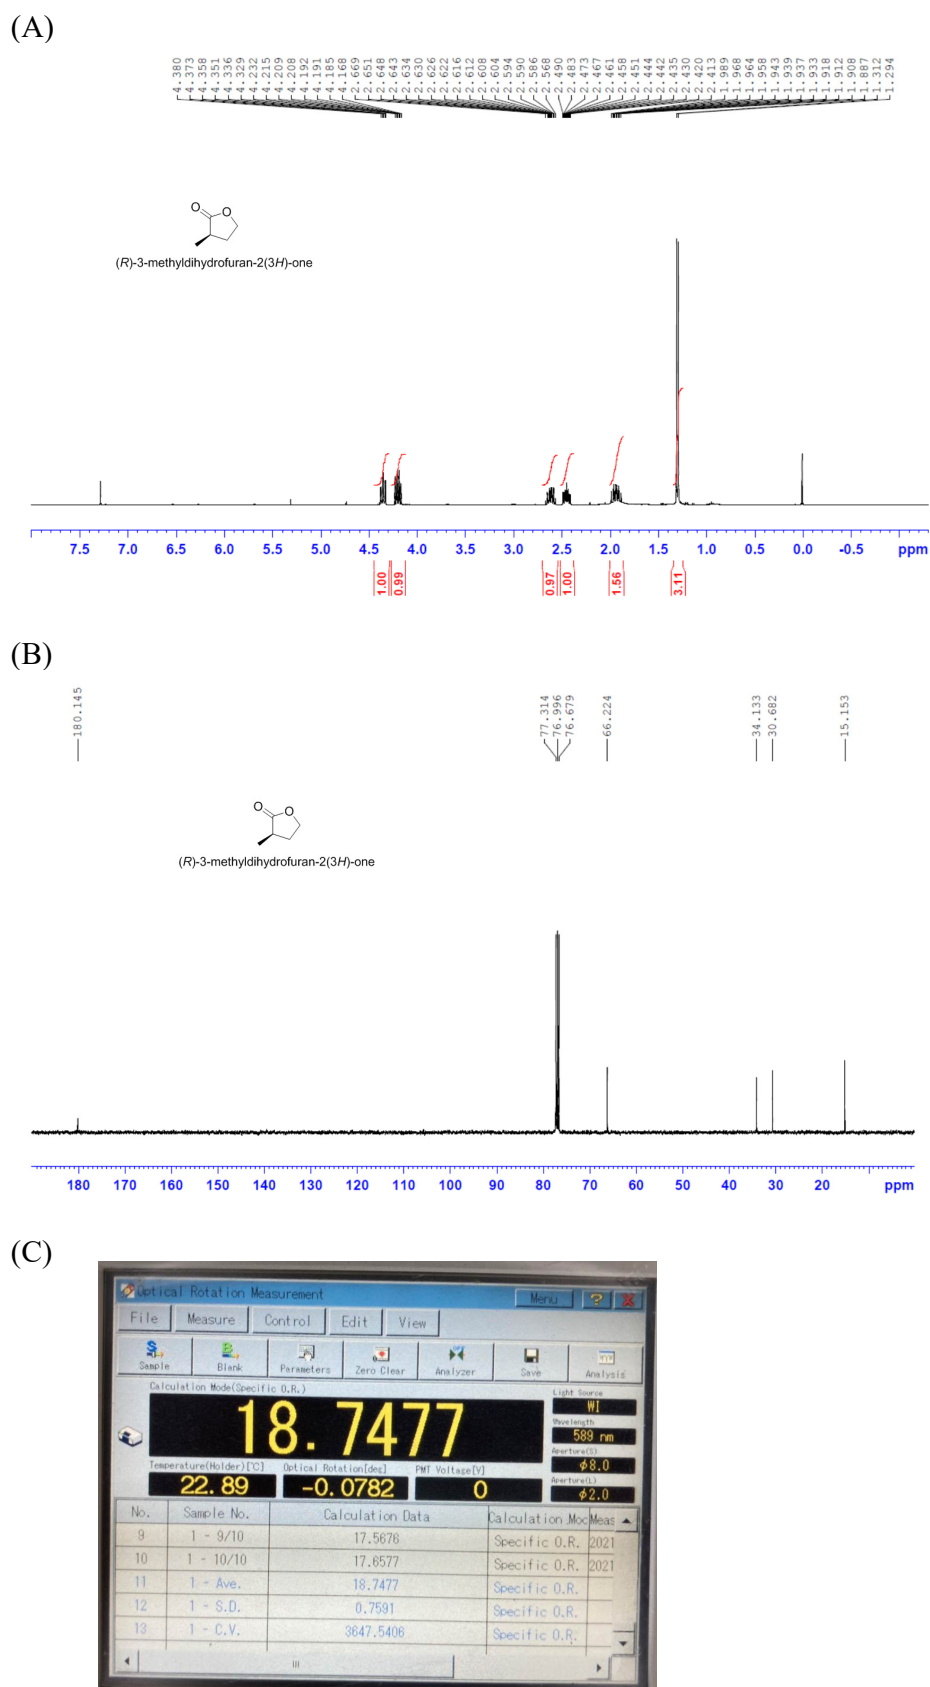

**Figure S28.**  $^1\text{H}$  NMR (400 MHz,  $\text{CDCl}_3$ ) (A),  $^{13}\text{C}$  NMR (100 MHz,  $\text{CDCl}_3$ ) (B), and optical rotation data (C) of the product, 3-methyldihydrofuran-2(3*H*)-one obtained from acid hydrolysis of compound **2**.

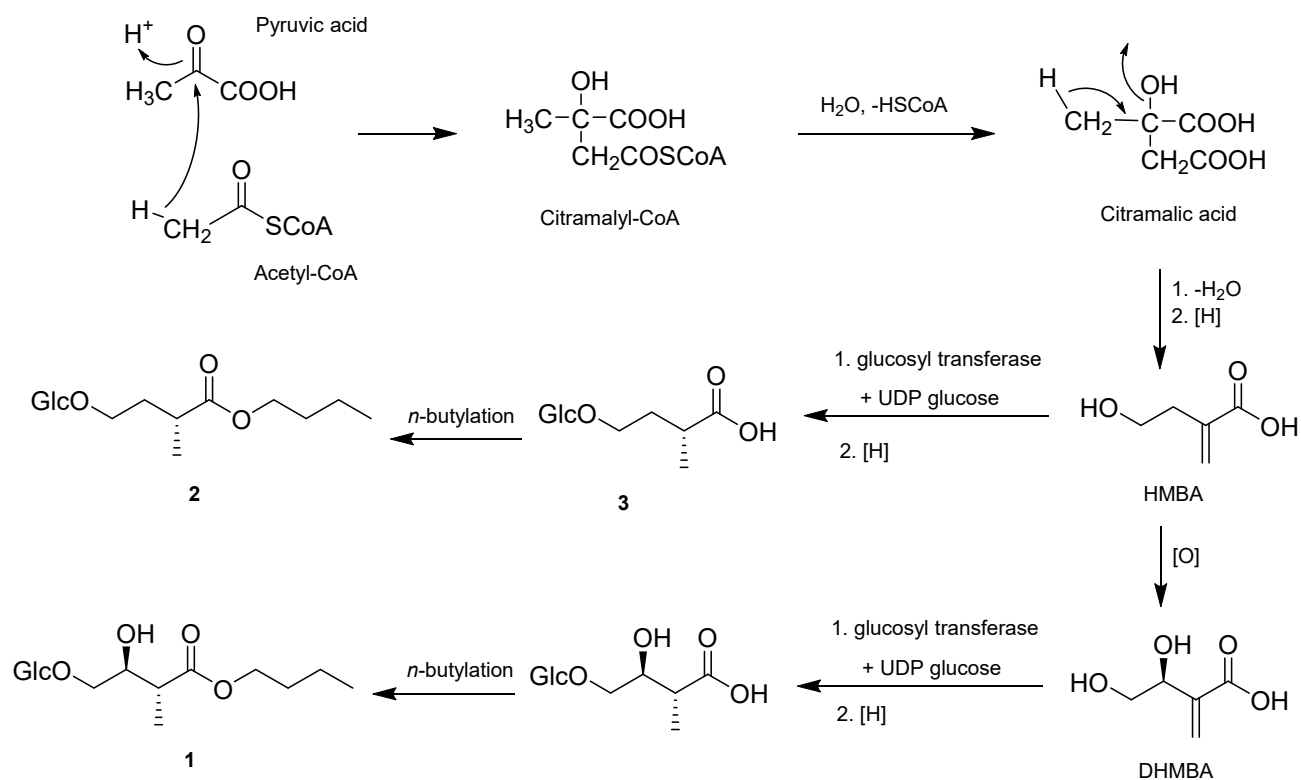

**Figure S29.** The possible biosynthesis of compounds **1–3** from D-glucose (Glc) and 4-hydroxy-2-methylenebutanoic acid (HMBA) and/or (*S*)-3,4-dihydroxy-2-methylenebutanoic acid (DHMBA). The UDP glucose and [H] mean uridine diphosphate glucose and chemical reduction, respectively.
